# Supplementary material for: Facile synthesis of highly luminescent rod-like terbium-based metal–organic frameworks for sensitive detection of olaquindox
Source: Royal Society of Chemistry journal article supplement (doi:10.1039/d1ay00824b), 2021-01-01
Supplement: d1ay00824b1.pdf [file d1ay00824b1.pdf]

## **Electronic Supporting Information**

*For*

### **Facile Synthesis of Highly Luminescent Rod-like Terbium-based Metal-organic Frameworks for Sensitive Detection of Olaquinox**

**Ling Li, Miaomiao Zhang, Ran Li, Huan Jiang, and Zhongde Liu\***

*Key Laboratory of Luminescent and Real-Time Analytical Chemistry (Southwest University),  
Ministry of Education, College of Pharmaceutical Science, Southwest University, Chongqing  
400716, China. Tel: +86-23-68251910. Fax: +86-23-68251048. E-mail: lzdzhy@swu.edu.cn.*

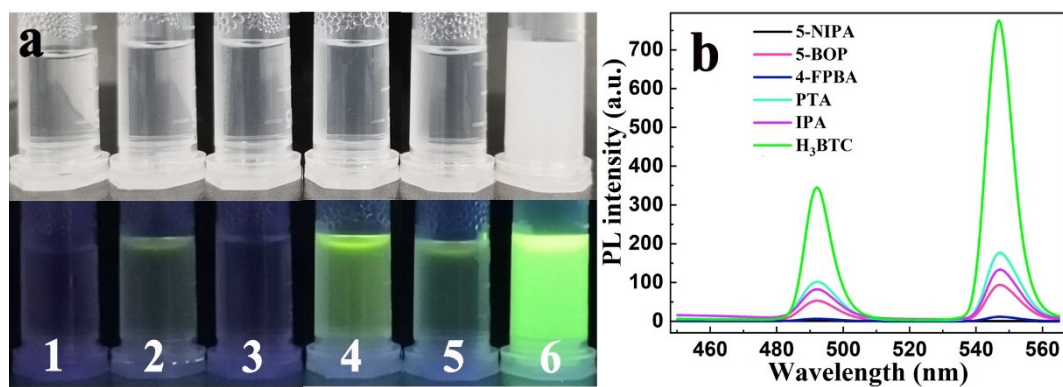

**Figure S1** (a) Photographs of the as-prepared terbium-based MOFs in a similar manner using different kinds of organic ligands under daylight (top) and 254 nm UV light (bottom), from 1 to 6: 5-Nitrobenzene-1, 3-dicarboxylic acid (5-NIPA), 3, 5-Dicarboxyphenylboronic acid (5-BOP), 4-Formylphenylboronic acid (4-FPBA), Terephthalic acid (PTA), Isophthalic acid (IPA), benzene-1, 3, 5-tricarboxylic acid (H<sub>3</sub>BTC); (b) the PL spectra of the corresponding terbium-based MOFs.

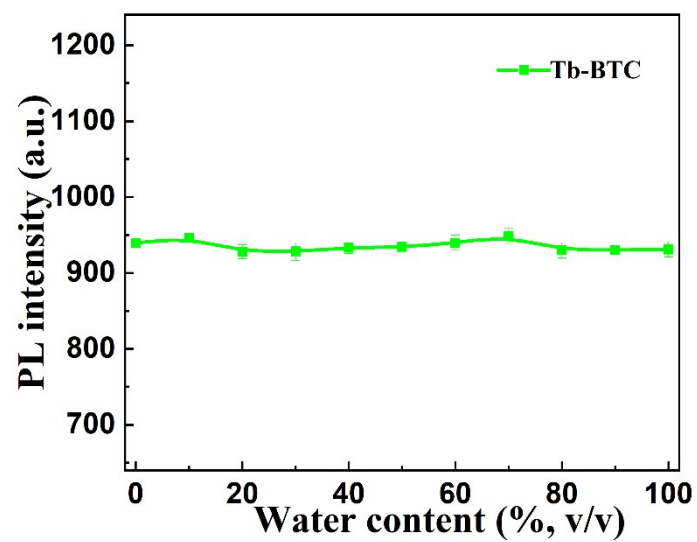

**Figure S2** Effect of the different water content exposure on PL intensity of the Tb-BTC MOFs.

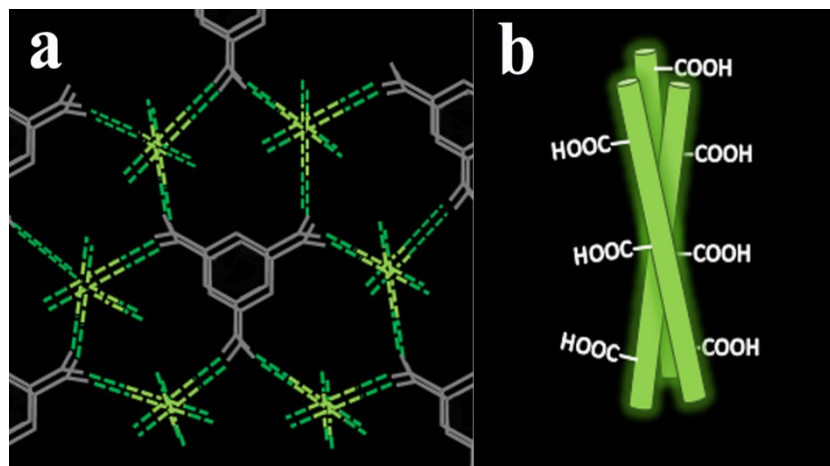

**Figure S3** (a) The possible molecular-packing diagram of the Tb-BTC viewed along the c-axis; (b) schematic description of the rod-like terbium-based MOFs.

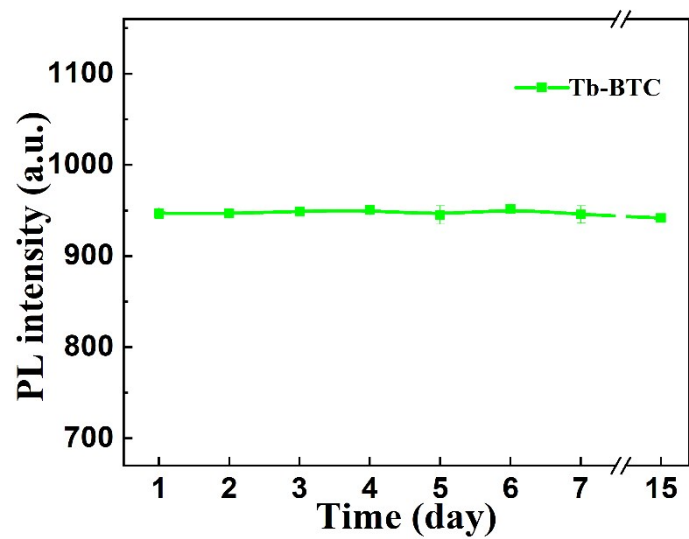

**Figure S4** The long term stability of the PL property of the Tb-BTC.

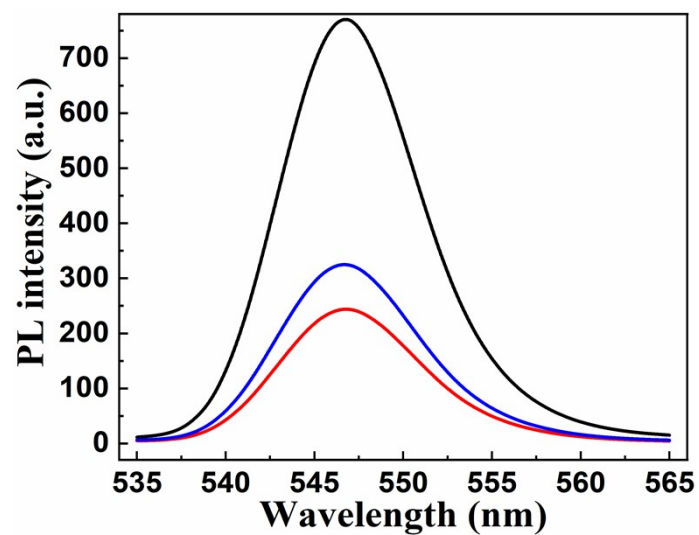

**Figure S5** Verification of the binding of OLA molecules on the surface of Tb-BTC. The black curve, the Tb-BTC suspension; the red curve, the mixture of the Tb-BTC and OLA; the blue curve, the resuspension solution of the precipitates obtained from the mixture of the Tb-BTC and OLA by centrifuge; Concentration: Tb-BTC, 0.2 mg/mL; OLA, 1.0 mM; pH 10.0.

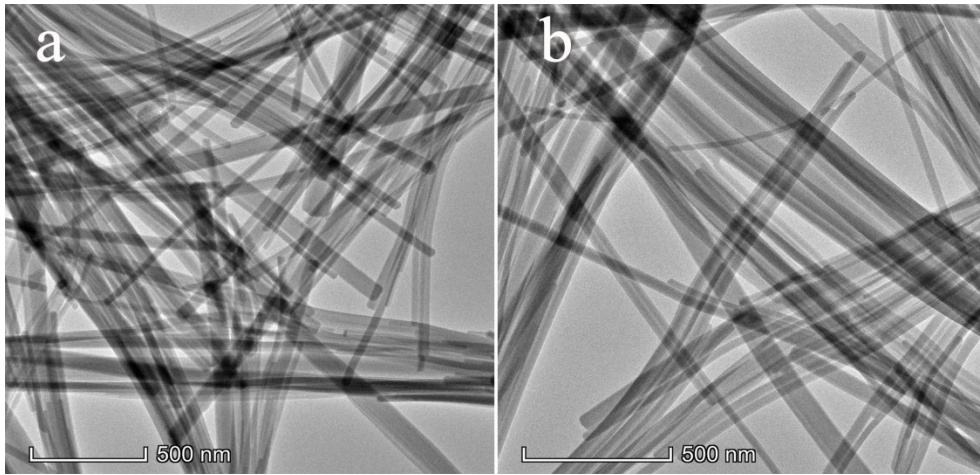

**Figure S6** TEM images of the as-prepared Tb-BTC MOFs in the absence (a) and presence of 50.0  $\mu\text{M}$  of OLA in the BR buffer (pH 10.0).

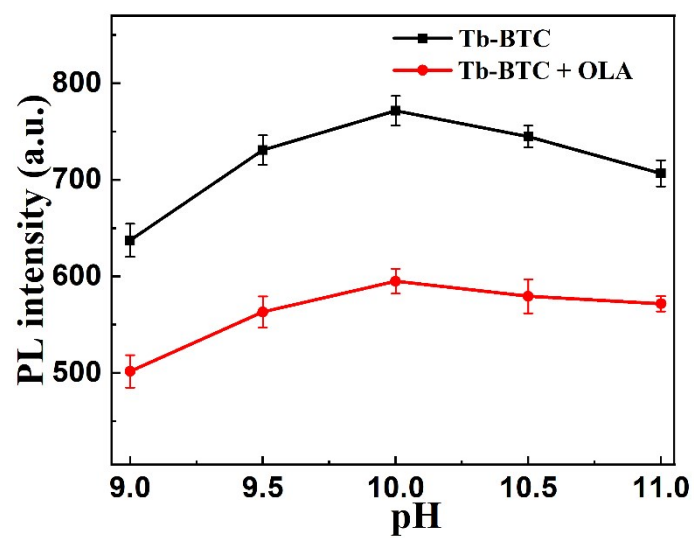

**Figure S7** Effect of pH on the PL intensity of Tb-BTC MOFs in the absence (black curve) and presence (red curve) of OLA. Concentration: Tb-BTC, 0.2 mg/mL; OLA, 10.0  $\mu$ M.



**Table S1** A brief summary of various methods for detection of OLA.

| Method                                        | Material used         | Sample         | Linear range       | LOD                  | Measure time (min) | Reference |
|-----------------------------------------------|-----------------------|----------------|--------------------|----------------------|--------------------|-----------|
| FELISA                                        | BSA-AuNCs             | Feed           | 1.0 – 150 µg/kg    | 0.68 µg/kg           | 1.5 h              | [1]       |
| electrochemical                               | spSWCNTs              | pork           | 0.1 - 500 nM       | 30.0 pM              | 25 min             | [2]       |
| FLISA                                         | QDs                   | pork           | 0.1 – 10.0 ng/mL   | 0.07 µg/L            | 1 h                | [3]       |
| chemiluminescence                             | molecularly imprinted | Feed           | 0.02 – 1.0. µg/mL  | 7 ng/mL              | 25 min             | [4]       |
| ELISA                                         |                       | Feed           | 1.0 – 90.0 µg/L    | 1 µg/kg              | 1.25 h             | [5]       |
| immunochematography                           | FMs                   | foodstuffs     | sigmoid curves     | 0.9 µg/kg            | 15 min             | [6]       |
| immunochematographic lateral flow test strips | colloidal gold        | pork           | 0.31 - 29.06 ng/mL | 0.31 ± 0.07 µg/kg    | 5 - 8 min          | [7]       |
|                                               |                       | urine          | 0.27 - 29.30 ng/mL | 0.27 ± 0.08 µg/kg    |                    |           |
| LC - MS/MS                                    | IAC                   | Fish           | 0.5 – 100.0 µg/L   | 0.01 µg/kg           | 7 min              | [8]       |
| UPLC-MS/MS                                    | HLB cartridge         | Feed           | 0.025 – 1.0 mg/kg  | 0.015 mg/kg          | 6 min              | [9]       |
| GICA                                          | AuNPs                 | Feed           | 0.9 - 43.62 µg/L   | 0.46 µg/L            | 5 min              | [10]      |
| Fluorescent                                   | Tb-BTC                | Feed/Pork/Fish | 1.0 – 1000.0 µM    | 20.6 nM (4.87 ng/mL) | 5 min              | This work |

## References

- [1] T. Peng, J. Wang, S. Xie, K. Yao, P. Zheng, Y. Ke, H. Jiang, *Food Additives & Contaminants: Part A*, 2019, **36**, 752-761.
- [2] H. Wang, Y. Liu, S. Yao, G. Hu, *Analytica Chimica Acta*, 2019, **1049**, 82-90.
- [3] T. Le, L. Zhu, H. Yu, *Food Chemistry*, 2016, **199**, 70–74.
- [4] Z. Xu, J. Song, L. Li, X. Qiao, H. Chen, *J Sci Food Agric*, 2012, **92**, 2696–2702.
- [5] L. Wang, J. Zhang, D. Cui, X. Wang, H. Yang, K. Zhang, Z. Qin, J. Meng, G. Hao & J. Li, *Analytical Letters*, 2014, **47**, 1015–1030.
- [6] T. Peng, X. Pei, Y. Zheng, J. Wang, Q. Wang, J. Li, X. Xia, H. Jiang, *Food and Agricultural Immunology*, 2017, **28**, 1544-1554.
- [7] C. Song, Q. Liu, A. Zhi, J. Yang, Y. Zhi, Q. Li, X. Hu, R. Deng, J. Casas, L. Tang, G. Zhang, *J. Agric. Food Chem.* 2011, **59**, 9319–9326.
- [8] J. Xie, W. Zeng, X. Gong, R. Zhai, Z. Huang, M. Liu, G. Shi, Y. Jiang, X. Dai, X. Fang, *Food Analytical Methods*, 2019, **12**, 2665–2674.
- [9] X. Miao, L. Xua, H. Li, Z. Yang, *Food Additives & Contaminants: Part A*, 2018, **35**, 1257-1265.
- [10] X. Pei, Q. Wang, X. Li, J. Xie, S. Xie, T. Peng, C. Wang, Y. Sun, H. Jiang, *Food Anal. Methods*, 2016, **9**, 919–1927.
